# Supplementary material for: Ultrafast Fabrication of H<sub>2</sub>SO<sub>4</sub>, LiCl, and Li<sub>2</sub>SO<sub>4</sub> Gel Electrolyte Supercapacitors with Reduced Graphene Oxide (rGO)-LiMnOx Electrodes Processed Using Atmospheric-Pressure-Plasma Jet
Source: Preprints.org preprint supplement (doi:10.20944/preprints202308.0157.v1), 2023-08-02
Supplement: Supplementary file 1 [file supplementary]

Supplementary Materials

Ultrafast fabrication of H2SO4, LiCl, and Li2SO4 gel electrolyte supercapacitors with reduced graphene oxide (rGO)-LiMnOx electrodes processed using atmospheric-pressure-plasma jet

Pei-Ling Lan1,2, I-Chih Ni3, Chih-I Wu3,4, Cheng-Che Hsu5, I-Chun Cheng3 and Jian-Zhang Chen1,2,4,*

1 Graduate Institute of Applied Mechanics, National Taiwan University, Taipei City 10617, Taiwan

2 Advanced Research Center for Green Materials Science and Technology, National Taiwan University, Taipei City 10617, Taiwan

3 Graduate Institute of Photonics and Optoelectronics and Department of Electrical Engineering, National Taiwan University, Taipei City 10617, Taiwan

4 Graduate School of Advanced Technology, National Taiwan University, Taipei City 10617, Taiwan

5 Department of Chemical Engineering, National Taiwan University, Taipei City 10617, Taiwan

***** Correspondence: Correspondence: jchen@ntu.edu.tw (J.Z.C.); Tel.: +886-2-33665694 (J.Z.C.)

**Supplementary Information**

| **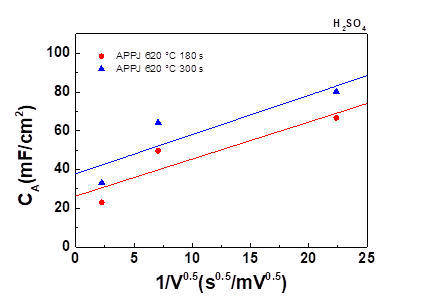** | **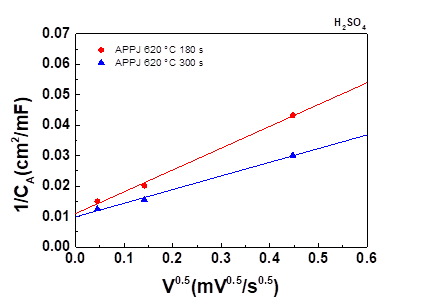** | **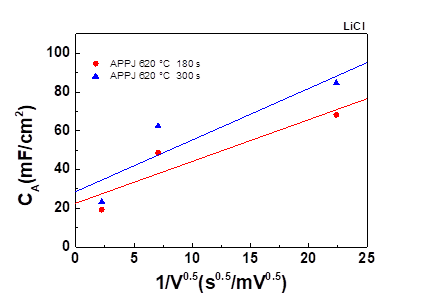** |
| --- | --- | --- |
| (**a-1**) | (**a-2**) | (b-1) |
| 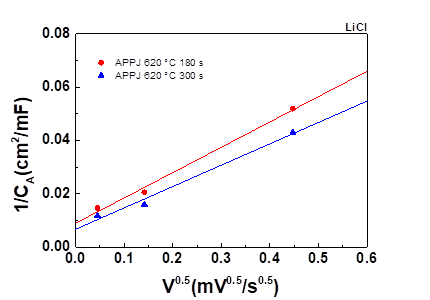 | 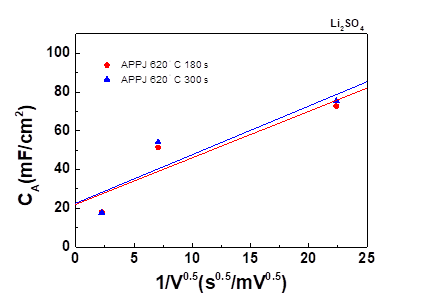 | 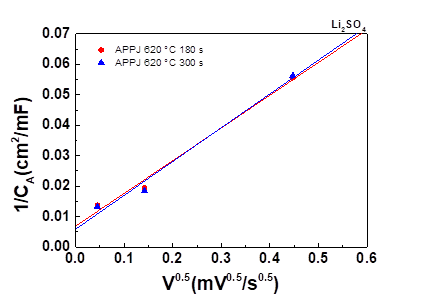 |
| (**b-2**) | (**c-1**) | (**c-2**) |
| 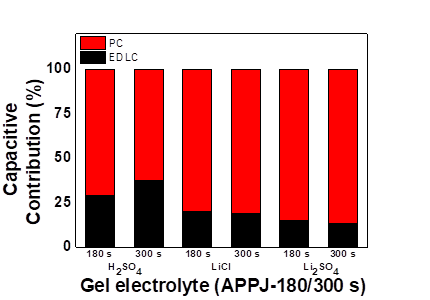 |  |  |
| (**d**) |  |  |

**Figure S1.** Trasatti plots generated for HSCs using 1 M (a) H2SO4, (b) LiCl, and (c) Li2SO4 gel electrolytes. Plots of (a-1, b-1, c-1) vs. and (a-2, b-2, c-2) vs. . (d) Capacitance contributions ratio of PC/EDLC.

**Table S1.** Capacitance contributions of HSCs.

|  |  | Ctotal  (mF/cm2) | Cout (mF/cm2) | Cin (mF/cm2) | Capacitive Contribution (EDLC:PC) (%) |
| --- | --- | --- | --- | --- | --- |
|  | APPJ - 180 s | 90.74 | 26.32 | 64.42 | 29.0:71.0 |
| APPJ - 300 s | 100.70 | 37.82 | 62.88 | 37.6:62.4 |
|  | APPJ - 180 s | 111.48 | 22.65 | 88.83 | 20.3:79.7 |
| APPJ - 300 s | 149.03 | 28.64 | 120.39 | 19.2:80.8 |
|  | APPJ - 180 s | 144.51 | 22.03 | 122.48 | 15.2:84.8 |
| APPJ - 300 s | 169.20 | 22.62 | 146.58 | 13.4:86.6 |
